# Supplementary material for: Epigenetic Age Acceleration in Frontotemporal Lobar Degeneration: A Comprehensive Analysis in the Blood and Brain
Source: MDPI journal article supplement (doi:10.3390/cells12141922), 2023-07-24
Supplement: s1 [file s1]

# Epigenetic Age Acceleration in Frontotemporal Lobar Degeneration: A Comprehensive Analysis in the Blood and Brain

Megha Murthy <sup>1,2</sup>, Patrizia Rizzu <sup>3</sup>, Peter Heutink <sup>3,4</sup>, Jonathan Mill <sup>5</sup>, Tammaryn Lashley <sup>1,6</sup> and Conceição Bettencourt <sup>1,6,\*</sup>

<sup>1</sup> Queen Square Brain Bank for Neurological Disorders, UCL Queen Square Institute of Neurology, London WC1N 1PJ, UK; t.lashley@ucl.ac.uk (T.L.)

<sup>2</sup> Department of Clinical and Movement Neurosciences, UCL Queen Square Institute of Neurology, London WC1N 1PJ, UK

<sup>3</sup> German Center for Neurodegenerative Diseases (DZNE), 72076 Tübingen, Germany

<sup>4</sup> Alector, Inc., South San Francisco, CA 94080, USA

<sup>5</sup> Department of Clinical and Biomedical Sciences, Faculty of Health and Life Sciences, University of Exeter, Exeter EX4 5DW, UK

<sup>6</sup> Department of Neurodegenerative Disease, UCL Queen Square Institute of Neurology, London WC1N 1PJ, UK

\* Correspondence: c.bettencourt@ucl.ac.uk

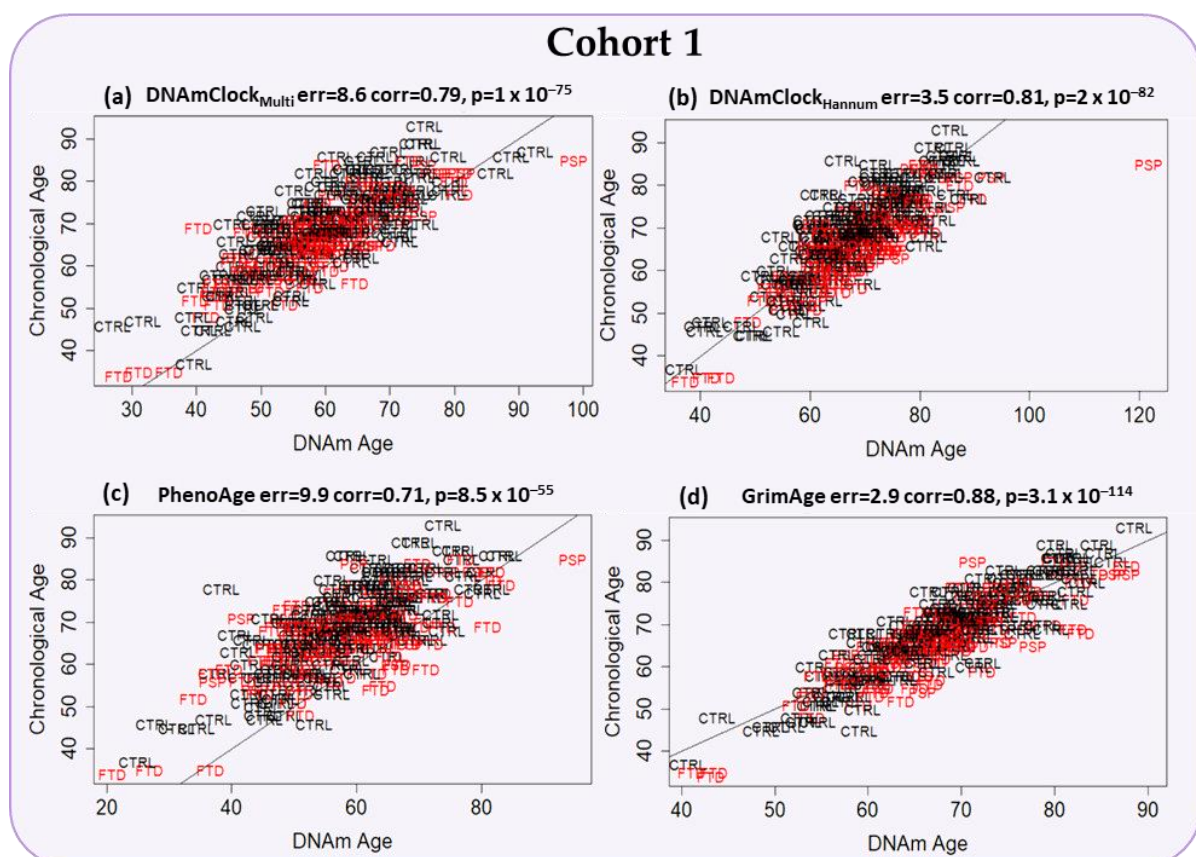

**Figure S1.** Epigenetic age analysis of the peripheral blood samples in Cohort 1 (purple) with the DNAmClock<sub>Multi</sub>, DNAmClock<sub>Hannum</sub>, PhenoAge, and GrimAge clocks: cohort 1 constituted FTD (n=117) and PSP cases (n=44) as well as controls (n=178). (a–d) Correlations between chronological age (y-axis) and DNAm age (x-axis) for all 4 clocks. CTRL – control, FTD – frontotemporal dementia, PSP – progressive supranuclear palsy.

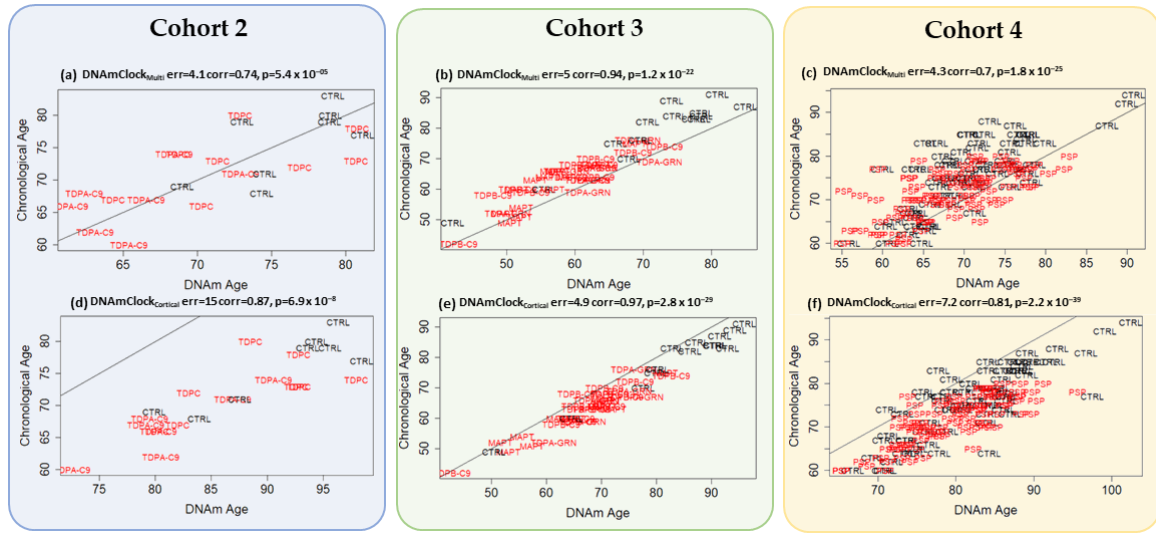

**Figure S2.** Epigenetic age analysis of post-mortem brain tissues using DNAmClock<sub>Multi</sub> and DNAmClock<sub>Cortical</sub>: cohort 2 (blue) constituted FTLD-TDP types A (*C9orf72* mutation carriers,  $n=7$ ), and C (sporadic cases,  $n=8$ ), and controls ( $n=8$ ), Cohort 3 (green) constituted FTLD-TDP types B (*C9orf72* mutation carriers  $n=13$ ), and A (*GRN* mutation carriers,  $n=7$ ), FTLD-Tau *MAPT* mutation carriers ( $n=13$ ) and controls ( $n=14$ ), and Cohort 4 (yellow) comprised PSP cases ( $n=93$ ) and controls ( $n=71$ ). (a–f) Correlations between chronological age (y-axis) and DNAm age (x-axis) for the cohorts with DNAmClock<sub>Multi</sub> and DNAmClock<sub>Cortical</sub>. CTRL – control, TDPA-C9 – FTLD-TDPA (*C9orf72* mutation carriers), TDPC – FTLD-TDPC (sporadic); TDPA-GRN – FTLD-TDPA (*GRN* mutation carriers), TDPB-C9 – FTLD-TDPB (*C9orf72* mutation carriers), MAPT – FTLD-Tau *MAPT* mutation carriers, PSP – progressive supranuclear palsy.

**Table S1.** Average DNAm ages and average age acceleration for the different cohorts.

| A) Peripheral Blood         |                              |                             |             |                                      |                                      |                             |                       |                      |                         |                         |      |
|-----------------------------|------------------------------|-----------------------------|-------------|--------------------------------------|--------------------------------------|-----------------------------|-----------------------|----------------------|-------------------------|-------------------------|------|
| Sample Group                | Average DNAm age, years (SD) |                             |             |                                      | Average age acceleration (residuals) |                             |                       |                      |                         |                         |      |
| Cohort 1                    | DNAmClockMulti <sub>i</sub>  | DNAmClockHannu <sub>m</sub> | PhenoAge    | GrimAge                              | DNAmClockMulti <sub>i</sub>          | DNAmClockHannu <sub>m</sub> | PhenoAge <sub>e</sub> | GrimAge <sub>e</sub> | IEAA <sub>i</sub> Multi | IEAA <sub>m</sub> Hannu | EEAA |
| Controls                    | 59.8 (10.5)                  | 68.1 (10.1)                 | 58.4 (10.6) | 59.8 (10.5)                          | -0.5                                 | -1.2                        | -0.9                  | -0.6                 | -0.5                    | -0.8                    | -1.6 |
| FTD                         | 57.1 (9.3)                   | 66.7 (8.5)                  | 57.4 (10.8) | 57.1 (9.3)                           | 0.3                                  | 0.8*                        | 1.1                   | 0.6                  | 0.4                     | 0.7*                    | 1.1* |
| PSP                         | 63.9 (9.4)                   | 73.9 (10.5)                 | 59.6 (10.0) | 63.9 (9.4)                           | 1.6                                  | 3.0*                        | -0.1                  | 0.8                  | 1.0                     | 1.7*                    | 3.7* |
| Total                       | 59.4 (10.1)                  | 68.3 (9.9)                  | 58.2 (10.6) | 59.4 (10.1)                          |                                      |                             |                       |                      |                         |                         |      |
| B) Post-mortem brain tissue |                              |                             |             |                                      |                                      |                             |                       |                      |                         |                         |      |
| Sample Group                | Average DNAm age, years (SD) |                             |             | Average age acceleration (residuals) |                                      |                             |                       |                      |                         |                         |      |
| Cohort 2                    | DNAmClockMulti               | DNAmClockCortical           |             | DNAmClockMulti                       | DNAmClockCortical                    |                             |                       |                      |                         |                         |      |
| Controls                    | 76.1 (4.1)                   | 91.2 (6.6)                  |             | 1.3                                  |                                      |                             | 0.0                   |                      |                         |                         |      |
| FTLD-TDPA (C9orf72)         | 65.8 (4.0)                   | 81.4 (5.8)                  |             | -2.2                                 |                                      |                             | -0.6                  |                      |                         |                         |      |
| FTLD-TDPC (Sporadic)        | 73.2 (5.8)                   | 88.7 (6.4)                  |             | 0.6                                  |                                      |                             | 0.5                   |                      |                         |                         |      |
| Total                       | 72.0 (6.3)                   | 87.3 (7.3)                  |             |                                      |                                      |                             |                       |                      |                         |                         |      |
| Cohort 3                    |                              |                             |             |                                      |                                      |                             |                       |                      |                         |                         |      |
| Controls                    | 71.3 (11.2)                  | 83.2 (12.6)                 |             | -0.2                                 |                                      |                             | -0.2                  |                      |                         |                         |      |
| FTLD-TDPA (GRN)             | 62.4 (7.2)                   | 70.3 (5.9)                  |             | 2.5                                  |                                      |                             | 1.1                   |                      |                         |                         |      |
| FTLD-TDPB (C9orf72)         | 59.4 (8.3)                   | 67.8 (9.3)                  |             | 0.1                                  |                                      |                             | -0.5                  |                      |                         |                         |      |
| FTLD-Tau (MAPT)             | 56.0 (5.5)                   | 65.5 (8.9)                  |             | -0.9                                 |                                      |                             | 0.1                   |                      |                         |                         |      |
| Total                       | 62.4 (10.3)                  | 72.1 (12.2)                 |             |                                      |                                      |                             |                       |                      |                         |                         |      |
| Cohort 4                    |                              |                             |             |                                      |                                      |                             |                       |                      |                         |                         |      |
| Controls                    | 70.7 (6.6)                   | 82.3 (7.35)                 |             | -0.5                                 |                                      |                             | -0.5                  |                      |                         |                         |      |
| PSP                         | 68.6 (6.3)                   | 79.7 (6.1)                  |             | 0.4                                  |                                      |                             | 0.4                   |                      |                         |                         |      |
| Total                       | 69.5 (6.5)                   | 80.8 (6.9)                  |             |                                      |                                      |                             |                       |                      |                         |                         |      |

Cohort 1 – purple; cohort 2 – blue; cohort 3 – green; cohort 4 – yellow; FTD – frontotemporal dementia; PSP – progressive supranuclear palsy; FTLD – frontotemporal lobar degeneration; FTLD-TDPA/C – FTLD with 43 kDa transactive response DNA-binding protein (TDP-43) positive inclusions, types A and C; *C9orf72* – *C9orf72* mutation carriers; *GRN* – *GRN* mutation carriers, FTLD-Tau – FTLD with tau-positive inclusions; *MAPT* – *MAPT* mutation carriers, SD – standard deviation, IEAA – intrinsic epigenetic age acceleration; EEAA – extrinsic epigenetic age acceleration. \* **Significant age acceleration upon pairwise comparisons with the corresponding controls.**

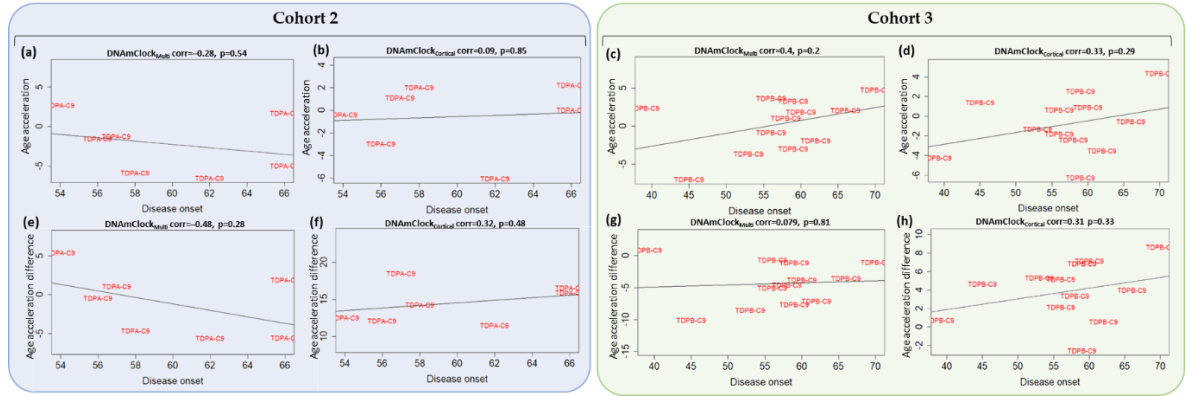

**Figure S3.** Association between age acceleration and disease onset with DNAmClockMulti and DNAmClockCortical for the *C9orf72* mutation carriers in cohorts 2 (blue) and 3 (green): age acceleration residuals (y-axis) for DNAmClockMulti and DNAmClockCortical versus disease onset (x-axis) for (a,b) Cohort 2 (FTLD-TDPA *C9orf72* mutation carriers), and (c,d) Cohort 3 (FTLD-TDPB *C9orf72* mutation carriers), age acceleration difference (y-axis) versus disease onset (x-axis) for (e,f) Cohort 2 and (g,h) Cohort 3. Age acceleration residuals were obtained by regressing DNA methylation age against chronological age and adjusting for confounding factors such as neuronal proportions obtained using a DNA methylation-based cell-type deconvolution algorithm. Age acceleration difference was the difference between DNA methylation age and chronological age. The correlation coefficient and p-values shown were calculated using Pearson correlation. TDPA-C9 - FTLD-TDPA (*C9orf72* mutation carriers), TDPB-C9 - FTLD-TDPB (*C9orf72* mutation carriers).

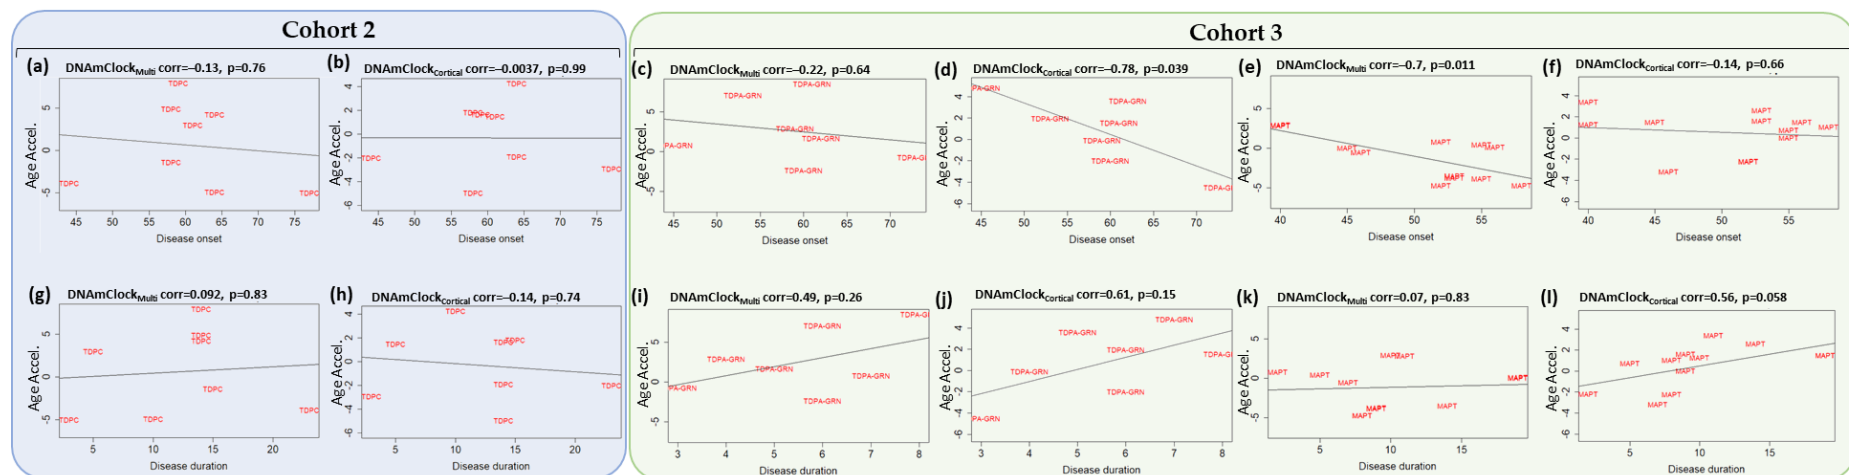

**Figure S4.** Association between age acceleration and disease onset and duration with DNAmClock<sub>Multi</sub> and DNAmClock<sub>Cortical</sub> for the FTLD-TDPC subtype in cohort 2 (blue) and FTLD-TDPA-GRN and FTLD-Tau-MAPT mutation carriers in cohort 3 (green): Age acceleration residuals (y-axis) for DNAmClock<sub>Multi</sub> and DNAmClock<sub>Cortical</sub> versus disease onset (x-axis) for (a,b) Cohort 2 (FTLD-TDPC), and (c-f) Cohort 3 (GRN and MAPT mutation carriers). Age acceleration residuals (y-axis) for DNAmClock<sub>Multi</sub> and DNAmClock<sub>Cortical</sub> versus disease duration (x-axis) for (g,h) Cohort 2 (FTLD-TDPC), and (i-l) Cohort 3 (GRN and MAPT mutation carriers). Age acceleration residuals were obtained by regressing DNA methylation age against chronological age and adjusting for confounding factors such as neuronal proportions obtained using a DNA methylation-based cell-type deconvolution algorithm. The correlation coefficient and p-values shown were calculated using Pearson correlation. TDPC – FTLD-TDP subtype C, TDPA-GRN – FLTD-TDPA GRN mutation carriers, MAPT – FTLD-Tau MAPT mutation carriers.
